# Supplementary material for: Cinnamate-Intercalated Layered Yttrium Hydroxide: UV Light-Responsive Switchable Material
Source: MDPI journal article supplement (doi:10.3390/mi14091791), 2023-09-19
Supplement: s1 [file s1]

# **Electronic Supporting Information**

## **Cinnamate-Intercalated Layered Yttrium Hydroxide: UV Light-Responsive Switchable Material**

Maria A. Teplonogova, Alexey D. Yapryntsev, Alexander E. Baranchikov, Vladimir K. Ivanov\*

Kurnakov Institute of General and Inorganic Chemistry of the Russian Academy of Sciences, Leninsky pr. 31, Moscow, 119991, Russia.

*E-mail:* van@igic.ras.ru

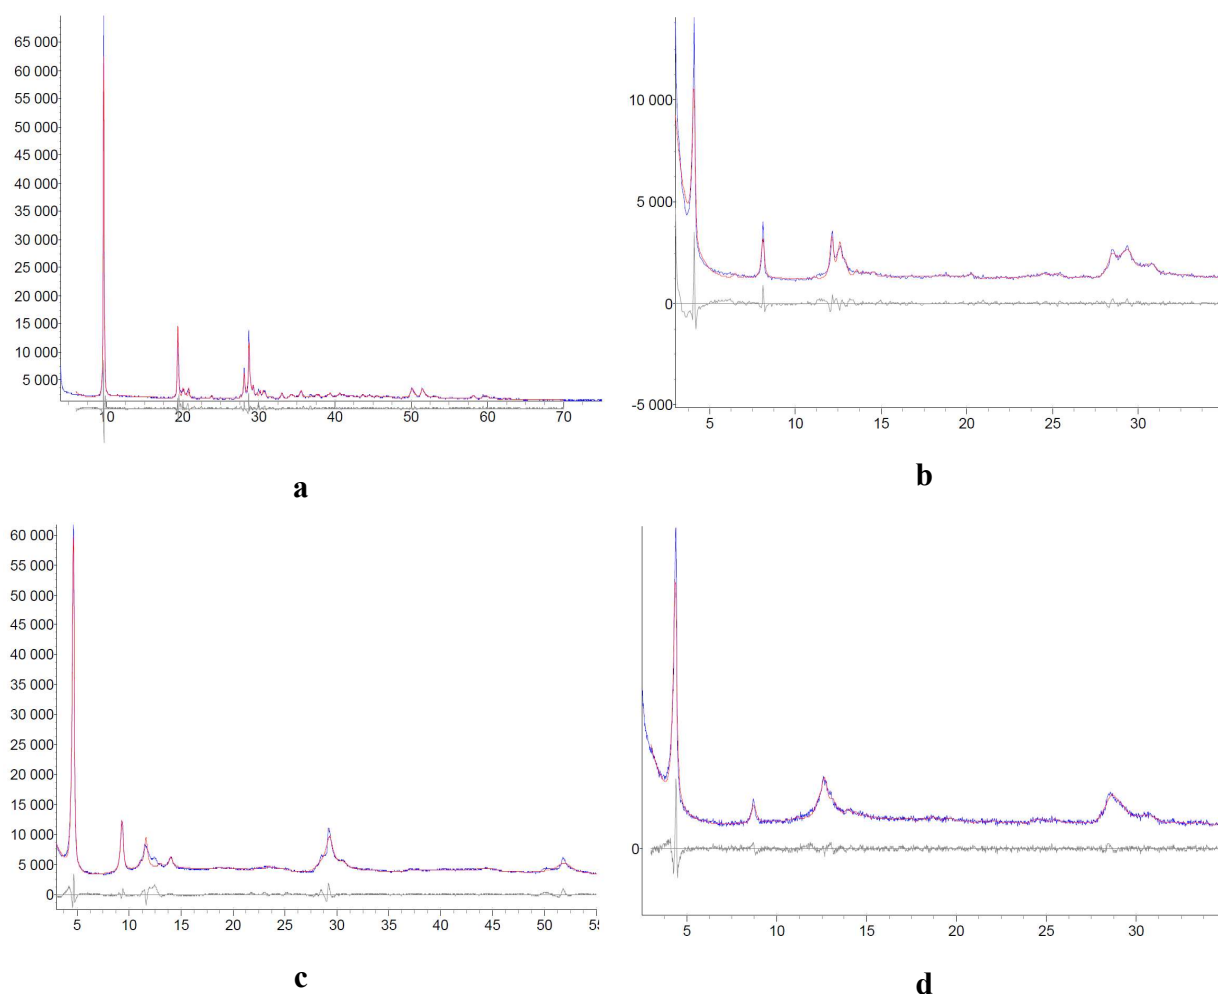

**Figure S1.** The full-profile refinement charts for the samples of (a) LYH-NO<sub>3</sub>; (b) trans-cinnamate intercalated LYH (LYH-trans); (c) cis-cinnamate intercalated LYH (LYH-cis); (d) trans-cinnamate intercalated LYH after 52.5 h of UV-exposure of the suspension in isopropanol.

**Table S1.** The results of full-profile refinement for LYH-NO<sub>3</sub>, trans-cinnamate (LYH-trans), and cis-cinnamate (LYH-cis) intercalated LYH sample (space group P2<sub>1</sub>).

| Sample                                          | a, Å        | b, Å       | c, Å       | β, °        | Rwp  |
|-------------------------------------------------|-------------|------------|------------|-------------|------|
| LYH-NO <sub>3</sub>                             | 13.2290(13) | 7.0100(20) | 9.1620(16) | 87.6550(93) | 7.86 |
| LYH-trans                                       | 13.955(28)  | 7.485(10)  | 21.712(12) | 81.29(13)   | 8.12 |
| LYH-cis                                         | 13.618(15)  | 6.972(11)  | 19.001(11) | 87.084(50)  | 5.05 |
| LYH-trans<br>after 52.5 h<br>of UV-<br>exposure | 14.474(21)  | 6.254(12)  | 20.640(31) | 84.518(44)  | 6.77 |

**Table S2.** Position of the bands ( $\text{cm}^{-1}$ ) in the Raman spectra of layered yttrium hydroxide (LYH) intercalated with cinnamate and assignment of the vibrations according to literature data [1]–[4].

| Layered<br>yttrium<br>hydroxo-<br>nitrate | LYH<br>intercalated<br>with trans-<br>cinnamate<br>at 120°C | LYH<br>intercalated<br>with cis-<br>cinnamate<br>at 120°C | LYH<br>intercalated<br>with trans-<br>cinnamate at<br>160°C | Cinnamic acid [3] |       | Vibration                                               |
|-------------------------------------------|-------------------------------------------------------------|-----------------------------------------------------------|-------------------------------------------------------------|-------------------|-------|---------------------------------------------------------|
|                                           |                                                             |                                                           |                                                             | monomer           | dimer |                                                         |
|                                           | 621                                                         | 621                                                       | 620                                                         | 621               | 618   | ring deformation                                        |
| 719                                       |                                                             |                                                           |                                                             |                   |       | $\delta(\text{NO}_3^-)$ [2]                             |
|                                           | 744                                                         |                                                           |                                                             |                   | 768   | ring (aliphatic)                                        |
|                                           |                                                             |                                                           |                                                             |                   | 808   | C-COOH                                                  |
|                                           | 853                                                         | 851                                                       | 854                                                         | 846               |       |                                                         |
|                                           | 876                                                         | 883                                                       | 876                                                         | 873               |       |                                                         |
|                                           | 1002                                                        | 1002                                                      | 1002                                                        | 1000              | 1000  | ring                                                    |
|                                           | 1029                                                        | 1031                                                      | 1029                                                        | 1026              | 1032  | C-H in plane                                            |
| 1055                                      |                                                             |                                                           |                                                             |                   |       | $\nu(\text{NO}_3^-)$ , $\delta(\text{OH})$<br>[2]       |
|                                           | 1158                                                        | 1157                                                      | 1158                                                        | 1161              | 1156  | C-H in plane;<br>inorganic $\text{CO}_3^{2-}$<br>[1]    |
|                                           |                                                             |                                                           |                                                             |                   | 1169  | C-H in plane                                            |
|                                           | 1182                                                        | 1180                                                      | 1183                                                        | 1179              | 1187  | C-H in plane [3]                                        |
|                                           | 1203                                                        | 1203                                                      | 1204                                                        | 1210              | 1207  | /                                                       |
|                                           |                                                             |                                                           |                                                             |                   | 1215  | cinnamate [1] /                                         |
|                                           | 1253                                                        | 1253                                                      | 1253                                                        | 1258              |       | C-O in plane [4]                                        |
|                                           |                                                             |                                                           |                                                             |                   | 1289  | C-H saturated                                           |
|                                           |                                                             |                                                           |                                                             |                   | 1360  |                                                         |
| 1406                                      |                                                             |                                                           | 1395                                                        |                   |       |                                                         |
|                                           | 1434                                                        |                                                           | 1435                                                        |                   |       | O-H in plane [4]                                        |
|                                           | 1456                                                        | 1451                                                      | 1457                                                        | 1450              |       | C-H unsaturated;<br>inorganic $\text{CO}_3^{2-}$<br>[1] |
|                                           | 1497                                                        | 1495                                                      | 1497                                                        | 1494              |       | C-H unsaturated                                         |
|                                           |                                                             |                                                           |                                                             |                   | 1586  | C=C (aromatic)                                          |
|                                           | 1603                                                        | 1600                                                      | 1603                                                        | 1599              | 1599  |                                                         |
|                                           | 1644                                                        | 1642                                                      | 1644                                                        | 1637              |       | C=C (isolated)<br>[1]<br>C=C (aliphatic)<br>[3]         |
|                                           |                                                             |                                                           |                                                             |                   | 2915  | C-H saturated                                           |
|                                           |                                                             |                                                           |                                                             |                   | 2942  |                                                         |
|                                           |                                                             |                                                           |                                                             |                   | 2964  |                                                         |
|                                           |                                                             |                                                           |                                                             |                   | 2986  |                                                         |
|                                           | 3060                                                        | 3060                                                      | 3060                                                        |                   | 3058  | O-H[1]; C-H<br>unsaturated [3]                          |

**Table S3.** Position of the bands ( $\text{cm}^{-1}$ ) in the infrared spectra of layered yttrium hydroxide (LYH) intercalated with cinnamate and assignment of the vibrations according to literature data [5].

| Trans-cinnamic acid | LYH intercalated with trans-cinnamate | LYH intercalated with cis-cinnamate | Mg <sub>2</sub> Al-LDH intercalated with trans-cinnamate [5] | Mg <sub>2</sub> Al-LDH intercalated with cis-cinnamate [5] | Vibration [5]                                  |
|---------------------|---------------------------------------|-------------------------------------|--------------------------------------------------------------|------------------------------------------------------------|------------------------------------------------|
| 1667                |                                       |                                     |                                                              |                                                            |                                                |
| 1626                | 1641                                  | 1636                                | 1637                                                         | 1637                                                       | n(C=C)cinn                                     |
| 1599                |                                       |                                     |                                                              |                                                            |                                                |
| 1576                | 1578                                  | 1577                                | 1576                                                         |                                                            | n(CC)ar + b(CH) + a(CCC)                       |
|                     |                                       | 1555                                |                                                              | 1550                                                       | n <sub>as</sub> (COO <sup>-</sup> )            |
|                     | 1545                                  |                                     | 1537                                                         |                                                            |                                                |
| 1494                | 1495                                  | 1497                                | 1499                                                         | 1493                                                       | b(CH) + n(CC)ar                                |
| 1447                | 1452                                  | 1448                                |                                                              |                                                            | b(CH) + n(CC)ar                                |
|                     |                                       | 1437                                |                                                              |                                                            |                                                |
| 1416                | 1423                                  | 1420                                |                                                              |                                                            | O-H                                            |
|                     | 1398                                  | 1399                                | 1394                                                         |                                                            | n <sub>s</sub> (COO <sup>-</sup> )             |
|                     |                                       | 1356                                |                                                              | 1363                                                       |                                                |
| 1333, 1311          |                                       |                                     |                                                              |                                                            |                                                |
| 1283                | 1292                                  | 1292                                | 1290                                                         |                                                            | b(CH)cinn + n(CC)                              |
|                     | 1250                                  | 1249                                | 1248                                                         |                                                            | b(CH)cinn                                      |
| 1219                |                                       |                                     |                                                              | 1211                                                       |                                                |
| 1205                | 1203                                  | 1203                                |                                                              |                                                            |                                                |
| 1175                |                                       |                                     |                                                              | 1184                                                       | b(CH)ar + n(CC)ar                              |
| 1158                |                                       | 1149                                |                                                              |                                                            |                                                |
| 1098                | 1070                                  | 1072                                | 1070                                                         | 1076                                                       | b(CH)ar + n(CC)ar                              |
|                     | 1047                                  | 1045                                |                                                              |                                                            |                                                |
| 1027                | 1028                                  | 1028                                |                                                              | 1032                                                       | b(CH)ar + n(CC)ar                              |
| 1000                |                                       |                                     |                                                              | 1007                                                       | a(CCC) + n(CCC)                                |
| 976                 | 974                                   | 978                                 | 978                                                          | 968                                                        | g(CCH)cinn                                     |
| 942                 |                                       |                                     |                                                              | 941                                                        |                                                |
| 909                 |                                       | 917                                 |                                                              |                                                            |                                                |
| 878                 | 876                                   | 878                                 | 880                                                          | 882                                                        | g(CH)ar                                        |
| 844                 | 850                                   | 848                                 | 850                                                          | 856                                                        | b <sub>s</sub> (COO <sup>-</sup> ) + b(CH)cinn |
| 765                 | 771                                   | 775                                 | 777                                                          | 764                                                        | g(CH)ar + g(HCCO) + g(OCOC)                    |
|                     | 737                                   |                                     |                                                              |                                                            |                                                |
| 707                 | 715                                   | 719                                 | 717                                                          |                                                            | F(CCC) + g(CH)ar                               |

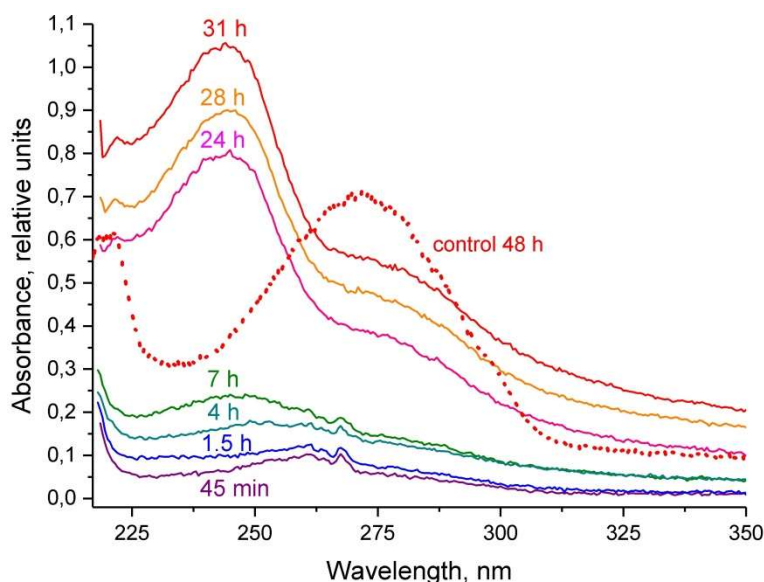

**Figure S2.** Absorption spectra of aliquots sampled at different time intervals during UV-irradiation of trans-cinnamate intercalated LYH suspension in isopropanol.

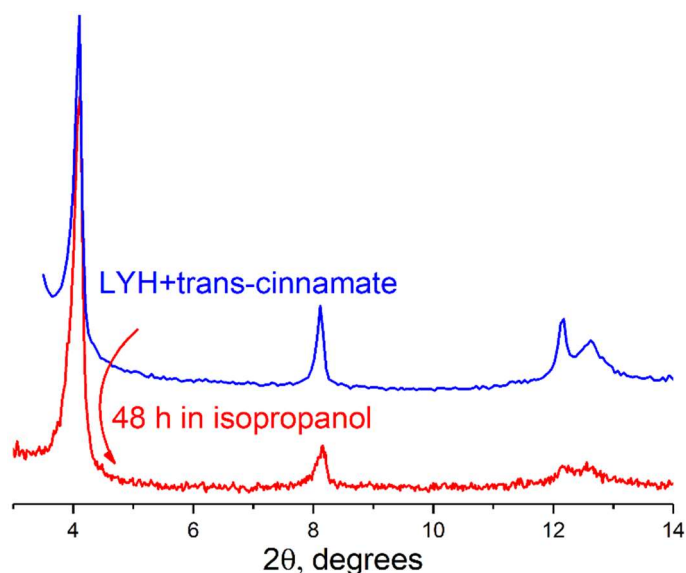

**Figure S3.** Diffraction patterns of the initial trans-cinnamate intercalated LYH and the product of its soaking in isopropanol for 48 h.

## References

- [1] Socrates, G. *IR and Raman characteristic group frequencies. Tables and charts*. 2001
- [2] Yapyrintsev, A. D., Skogareva, L. S., Gol'dt, A. E., Baranchikov, A. E., Ivanov, V. K. *Synthesis of a peroxo derivative of layered yttrium hydroxide // Russian Journal of Inorganic Chemistry*, 2015, V. 60, № 9, P. 1027–1033, DOI: 10.1134/S0036023615090211
- [3] Allen, S. D. M., Almond, M. J., Bruneel, J. L., Gilbert, A., Hollins, P., Mascetti, J. *Photodimerization of trans-cinnamic acid and its derivatives: A study by vibrational*

- microspectroscopy* // **Spectrochimica Acta - Part A: Molecular and Biomolecular Spectroscopy**, 2000, V. 56, № 12, P. 2423–2430, DOI: 10.1016/S1386-1425(00)00294-8
- [4] Hanai, K., Kuwae, A., Takai, T., Senda, H. *A comparative vibrational and NMR study of cis-cinnamic acid polymorphs and trans-cinnamic acid* // 2001, V. 57, P. 513–519
- [5] Timár, Z., Varga, G., Szabados, M., Csankó, K., Alapi, T., Forano, C., *et al.* *Structural insight into the photoinduced E→Z isomerisation of cinnamate embedded in ZnAl and MgAl layered double hydroxides* // **Journal of Molecular Structure**, 2020, V. 1219, DOI: 10.1016/j.molstruc.2020.128561
